# Supplementary material for: Risk factors for interpersonal violence: an umbrella review of meta-analyses
Source: PubMed Central journal article supplement (PMC6157722; doi:10.1192/bjp.2018.145), 2018-10
Supplement: NIHMS78307-supplement-Appendices.pdf [file NIHMS78307-supplement-Appendices.pdf]

## Supplementary Material - BJPsych-18-0043 - Appendices

### Appendix 1 – Formulae used

- 1) Converting Cohen's d to Odds Ratio:

$$\text{Cohen's } d = \text{Log OddsRatio}(\sqrt{3/\pi})$$

$$\text{Or, OR} = e^{\pi d/\sqrt{3}}$$

- 2) Converting correlation coefficient ('r') to Odds Ratio: Error! Bookmark not defined.

First r was converted to Cohen's d as follows:

$$\text{Cohen's } d = 2r / \sqrt{(1-r^2)}$$

The Cohen's d value was then used to calculate Odds Ratio from formula:

$$\text{Cohen's } d = \text{LogOddsRatio}(\sqrt{3/\pi})$$

$$\text{Or, OR} = e^{\pi d/\sqrt{3}}$$

- 3) Converting Odds Ratio to Relative Risk:

$$\text{RR} = \text{OR}/(1-P_0+(P_0 \times \text{OR}))$$

Where  $P_0$  = baseline risk or prevalence

- 4) Population attributable fraction:

$$\text{PAF} = [P_0 (\text{RR}-1)]/[1+ P_0 (\text{RR}-1)]$$

Where  $P_0$  is the proportion of exposed subjects in the study population

The above are based on reference numbers: 9, 10 and 11 in main manuscript

*Appendix 2 - Risk Factors with Outcome Measures Related to Interpersonal Violence*

| <b>Risk Factor</b>                                                                 | <b>Outcome Measure</b>              | <b>Review Type</b> | <b>Summary</b>                                                                                         |
|------------------------------------------------------------------------------------|-------------------------------------|--------------------|--------------------------------------------------------------------------------------------------------|
| Post-traumatic stress disorder <sup>i</sup>                                        | Anger and hostility                 | Meta-analysis      | Weighted mean effect size $r = 0.5$                                                                    |
| Exposure to violence in the form of video games, television and film <sup>ii</sup> | Aggression                          | Meta-analysis      | Overall effect size was, $r = 0.1$                                                                     |
| Exposure to media violence <sup>iii</sup>                                          | Aggression and criminal aggression  | Meta-analysis      | Authors unable to calculate effect size for criminal aggression. Effect size for aggression, $r = 0.2$ |
| Exposure to violent video-games <sup>iv</sup>                                      | Aggression                          | Meta-analysis      | “Causal risk factor” – Overall $r = 0.2$                                                               |
| Genetic influences <sup>v</sup>                                                    | Antisocial behaviour                | Meta-analysis      | $r = 0.3$ - Variance due to additive genetic influences,                                               |
| Individual gene studies <sup>vi</sup>                                              | Violence and aggression             | Meta-analysis      | No candidate gene studies were associated with violence.                                               |
| Central serotonin function <sup>vii &amp; viii</sup>                               | Aggression and antisocial behaviour | Meta-analyses (2)  | $r = -0.1$ for aggression<br>$d = -0.5$ for antisocial behaviour                                       |

|                                                                               |                                          |                   |                                                                                                                                                                                                                                                                                                                                                                                                                                                                                                                                                      |
|-------------------------------------------------------------------------------|------------------------------------------|-------------------|------------------------------------------------------------------------------------------------------------------------------------------------------------------------------------------------------------------------------------------------------------------------------------------------------------------------------------------------------------------------------------------------------------------------------------------------------------------------------------------------------------------------------------------------------|
| Low resting heart rate <sup>ix, x, xi</sup>                                   | Antisocial behaviour and aggression      | Meta-analyses (3) | <p>d = -0.2 (SE 0.39, p &lt; .001) for low resting heart rate.</p> <p>d = 0.4 (0.3-0.5) for low resting heart rate.</p> <p>d = 0.1 (0.1-0.3) for resting electrodermal activity</p> <p>d = 0.1 (-0.0-0.2) for heart rate during stressor – Authors conclude heart rate reactivity is not significantly associated with aggression.</p> <p>d = - 0.4 (-.5- -0.4) for resting heart rate and levels of antisocial behaviour in children and adolescents</p> <p>d = - 0.8 (-0.9 - -0.6) for heart rate during stressor in children and adolescents.</p> |
| Impairments in P300 event-related potential and P300 latencies <sup>xii</sup> | “Antisocial” or “psychopathic” behaviour | Meta-analysis     | <p>d = 0.3 (0.2-0.3) - reduced P3 amplitudes</p> <p>d = 0.1 (0.0-0.3) - longer P3 latencies</p>                                                                                                                                                                                                                                                                                                                                                                                                                                                      |
| Increased testosterone levels <sup>xiii</sup>                                 | Aggressive behaviour                     | Meta-analysis     | r = 0.1 (-0.3 – 0.7)                                                                                                                                                                                                                                                                                                                                                                                                                                                                                                                                 |

## References

- i. Orth, U. and E. Wieland. Anger, hostility, and posttraumatic stress disorder in trauma-exposed adults: A meta-analysis. *Journal of Consulting and Clinical Psychology* **74(4)**, 698 (2006).
- ii. Savage, J., & Yancey, C. The effects of media violence exposure on criminal aggression a meta-analysis. *Criminal Justice and Behavior* **35(6)**, 772-791 (2008).
- iii. Ferguson, C. J., & Kilburn, J. The public health risks of media violence: A meta-analytic review. *The Journal of pediatrics* **154(5)**, 759-763 (2009).
- iv. Anderson, C. A. et al. Violent video game effects on aggression, empathy, and prosocial behavior in eastern and western countries: a meta-analytic review. *Psychological bulletin* **136(2)**, 151 (2010).
- v. Rhee, S. H., & Waldman, I. D. Genetic and environmental influences on antisocial behavior: a meta-analysis of twin and adoption studies. *Psychological bulletin*, **128(3)**, 490 (2002).
- vi. Vassos, E., et al. Systematic meta-analyses and field synopsis of genetic association studies of violence and aggression. *Molecular psychiatry* **19(4)**, 471-477 (2013).
- vii. Moore, T. M., Scarpa, A., and Raine, A. A meta-analysis of serotonin metabolite 5-HIAA and antisocial behavior. *Aggressive behavior* **28(4)**, 299-316 (2002).
- viii. Duke, A. A., et al. Revisiting the serotonin–aggression relation in humans: A meta-analysis. *Psychological bulletin* **139(5)**, 1148-72 (2013).
- ix. Lorber, M. F. Psychophysiology of aggression, psychopathy, and conduct problems: a meta-analysis. *Psychological bulletin* **130(4)**, 531 (2004).
- x. Ortiz, J. and A. Raine. Heart rate level and antisocial behavior in children and adolescents: A meta-analysis. *Journal of the American Academy of Child & Adolescent Psychiatry* **43(2)**, 154-162 (2004).
- xi. Portnoy J., Farrington D.P., Resting heart rate and antisocial behavior: An updated systematic review and meta-analysis. *Aggression and violent behavior*, 2015 – Elsevier.
- xii. Gao, Y. and Raine, A. P3 event-related potential impairments in antisocial and psychopathic individuals: A meta-analysis. *Biological psychology* **82(3)**, 199-210 (2009).
- xiii. Book, A. S., Starzyk, K. B. and Quinsey, V. L. The relationship between testosterone and aggression: A meta-analysis. *Aggression and Violent Behavior* **6(6)**, 579-599 (2001).

*Appendix 3 – PRISMA flow diagram of systematic search strategy for risk factors for violence*

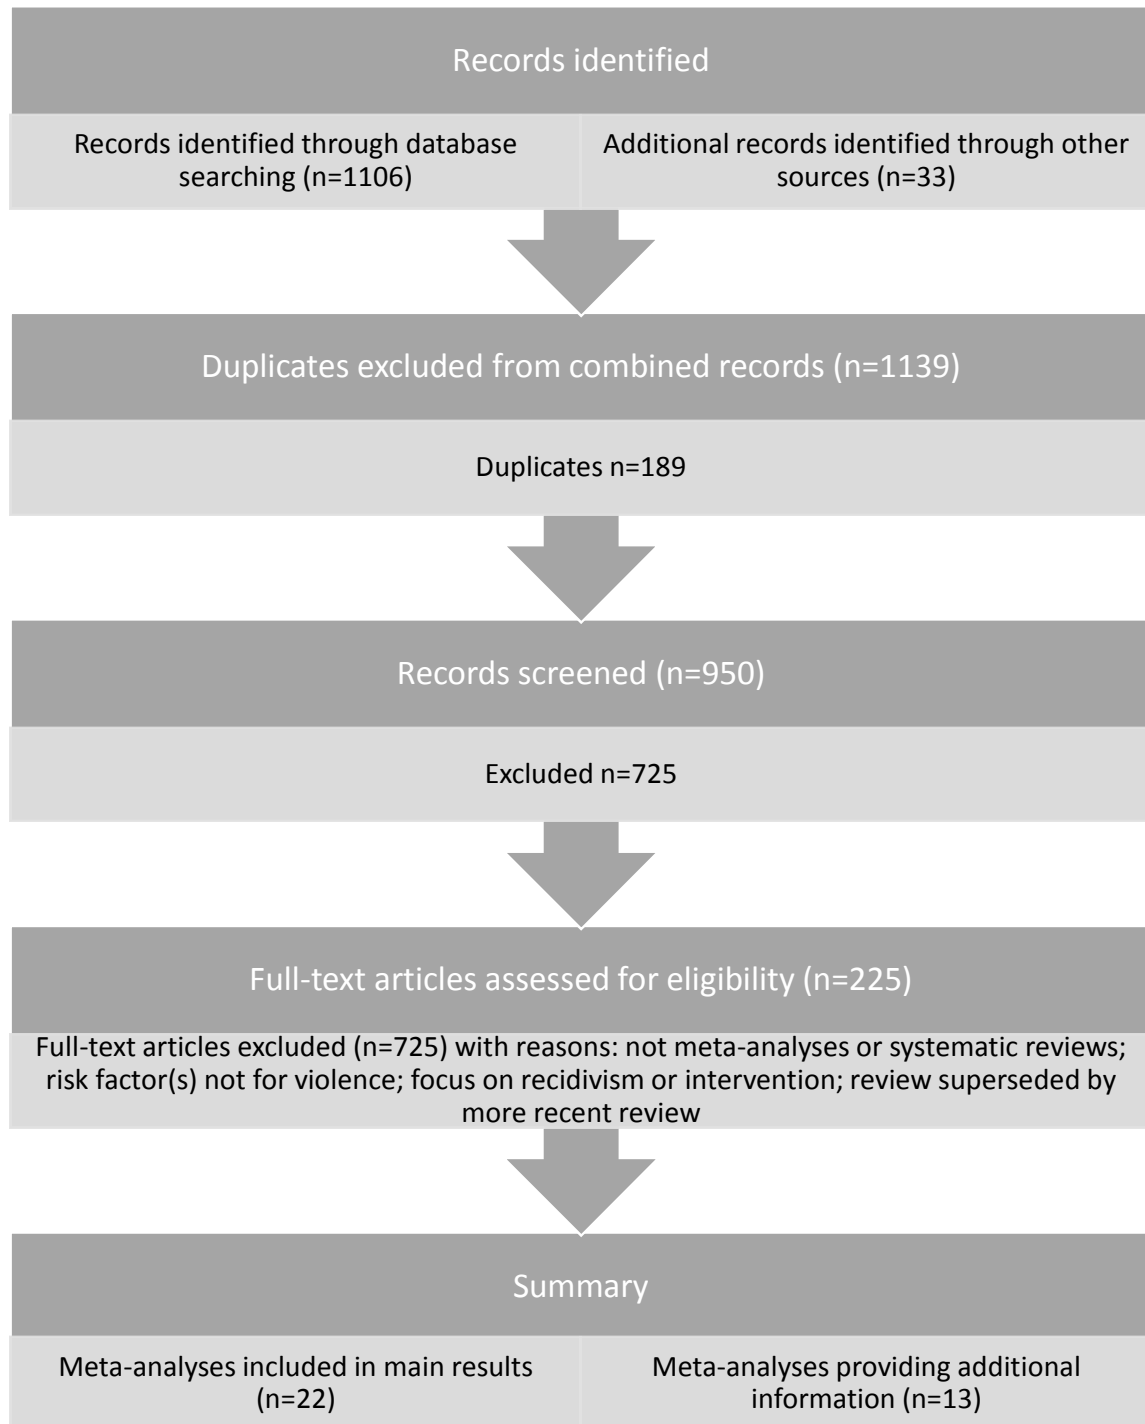

*Appendix 4 - Effect sizes of parental risk factors for violence*

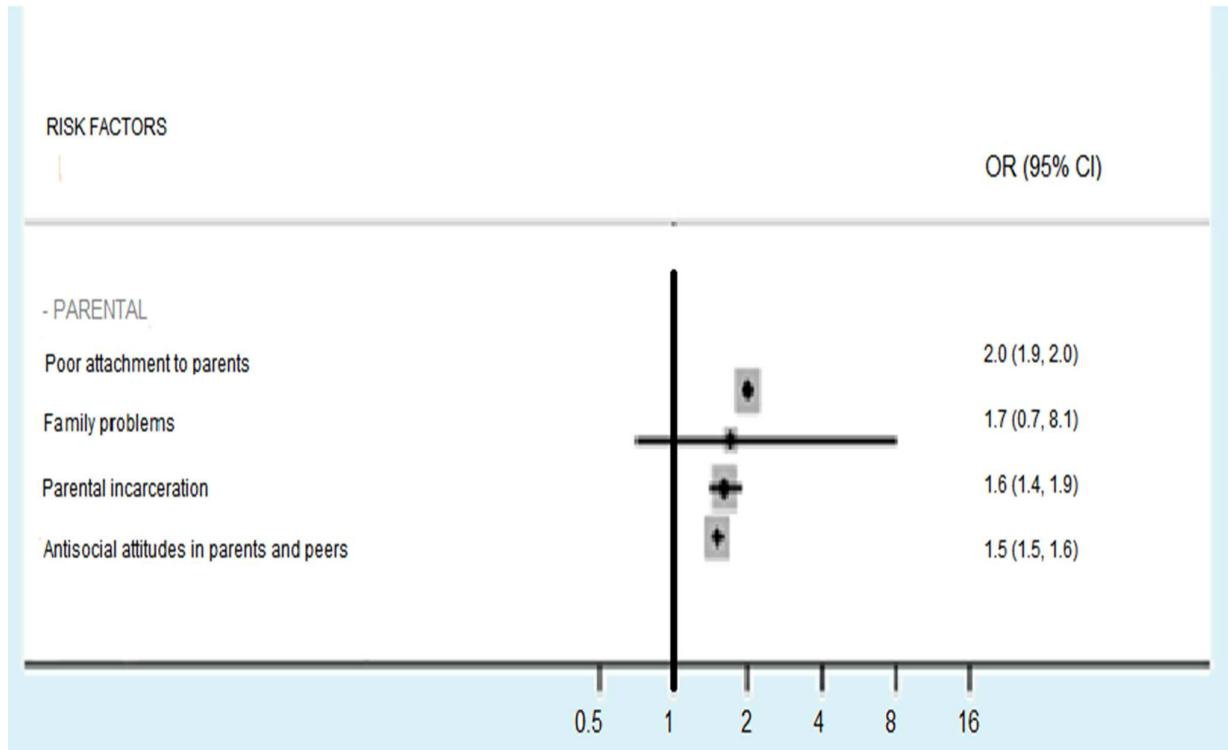

**Figure – Effect sizes of parental risk factors for violence**

Note: OR=odds ratio, CI=confidence interval. Adjusted ORs were used when possible.

*Appendix 5 - Effect sizes of risk factors for intimate partner violence*

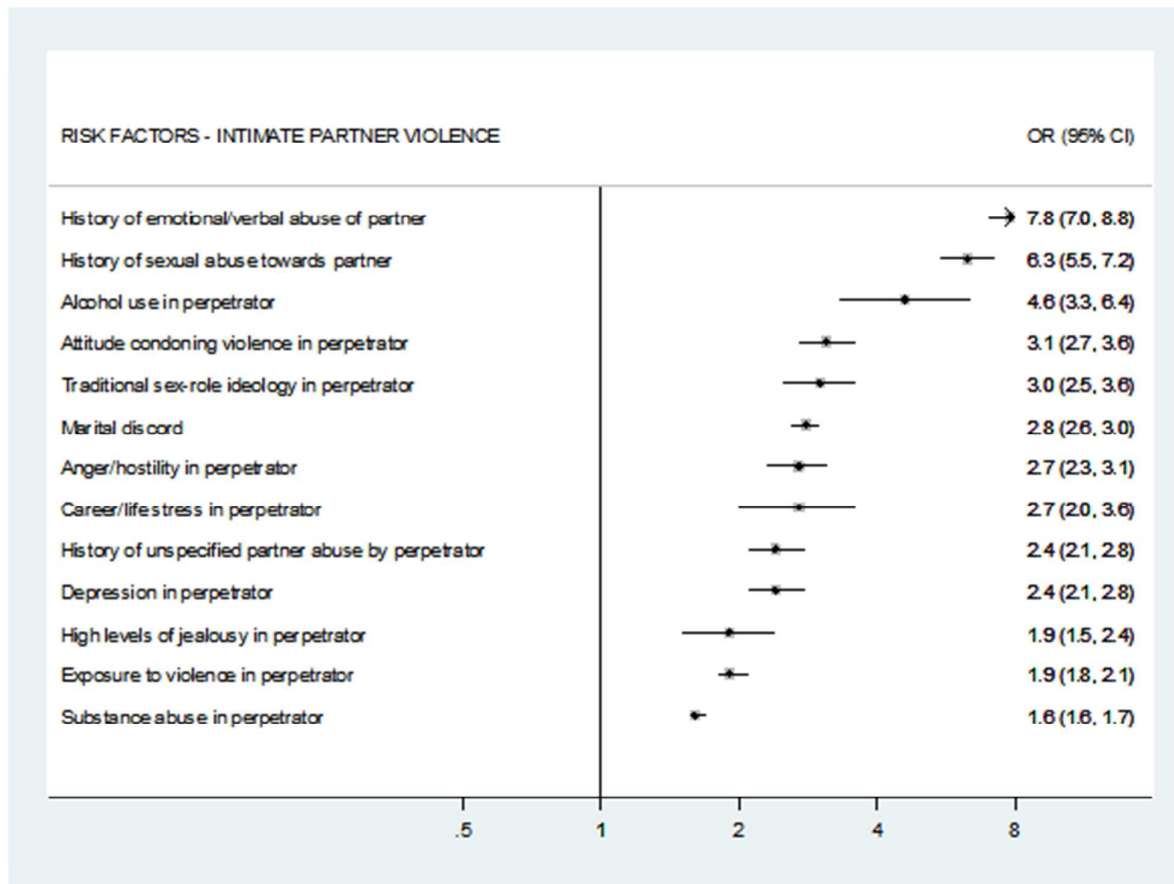

**Figure – Effect sizes of risk factors for intimate partner violence**

Note: OR=odds ratio, CI=confidence interval. Adjusted ORs were used when possible.

*Appendix 6 - Effect sizes of risk factors for sexual violence and homicide*

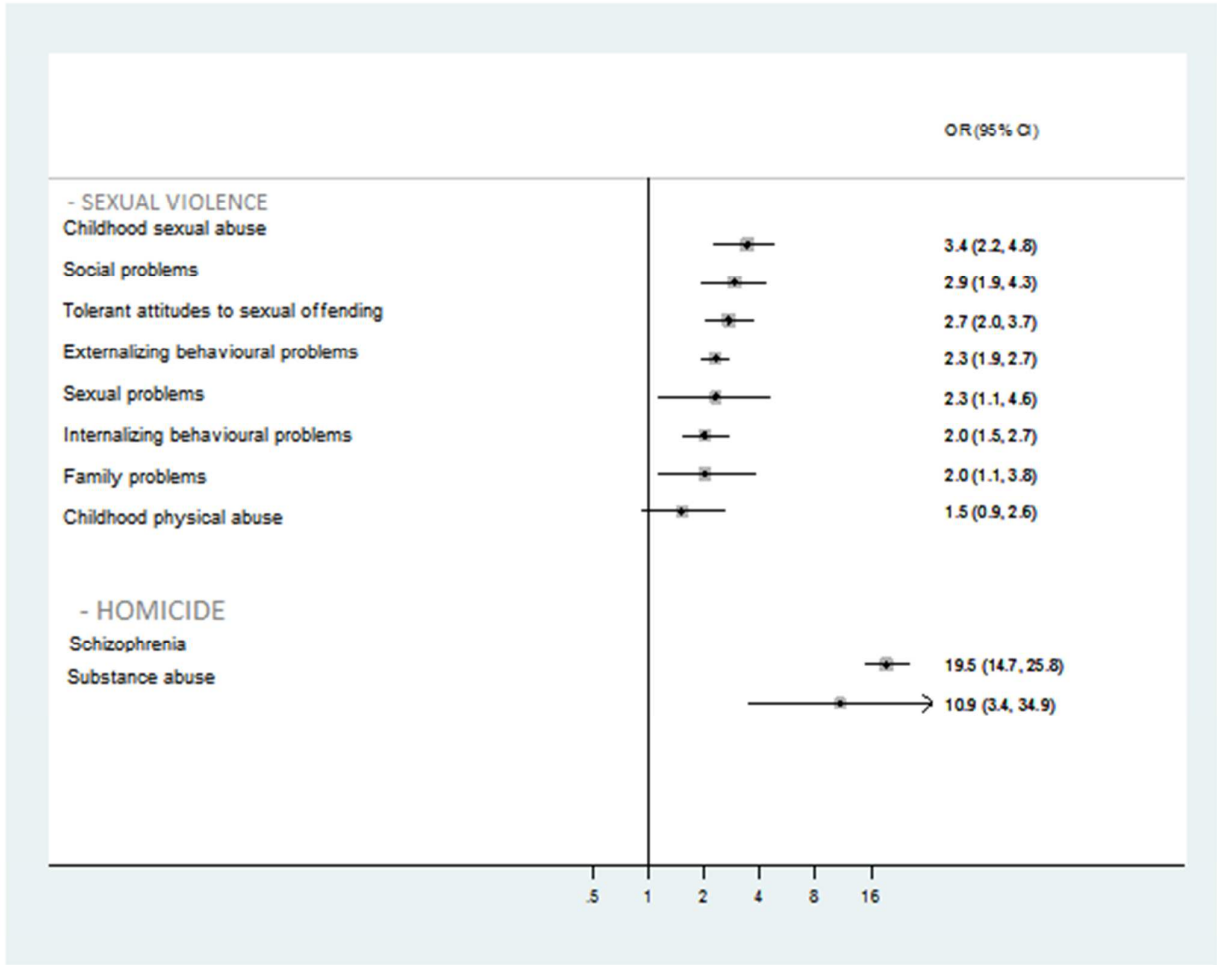

**Figure – Effect sizes of risk factors for sexual violence and homicide**

Note: OR=odds ratio, CI=confidence interval. Adjusted ORs were used when possible.



*Appendix 7 - Meta-review of risk factors for violence stratified by gender*

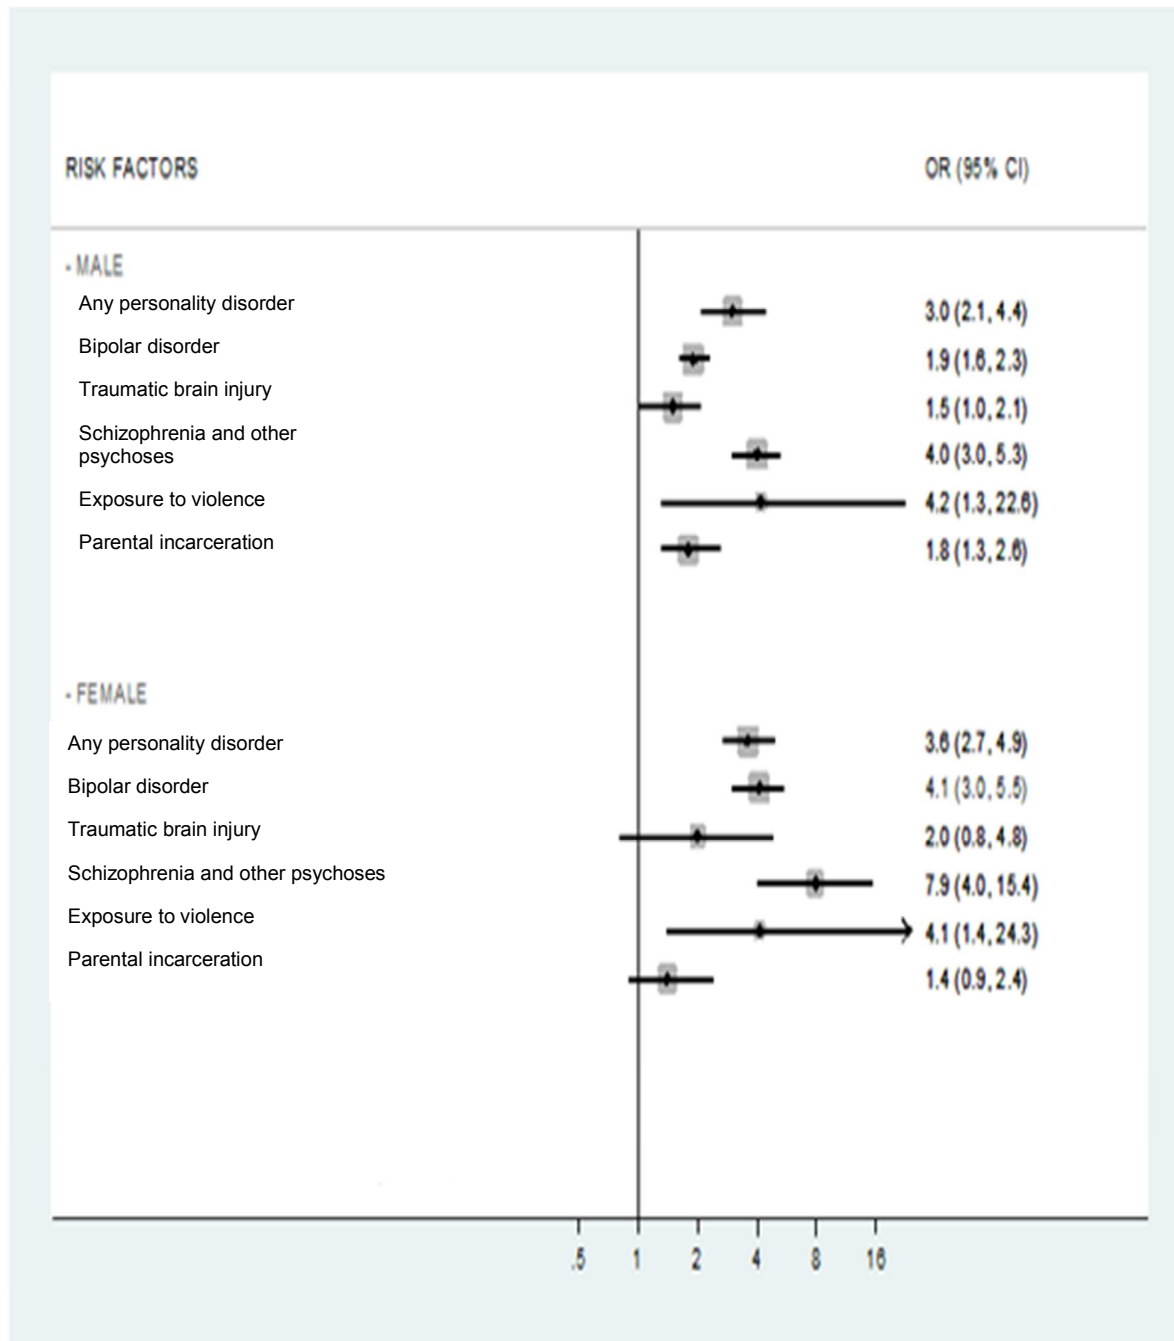

**Figure – Meta-review of risk factors for violence stratified by gender**

Note: OR=odds ratio, CI=confidence interval. Adjusted ORs were used when possible.

*Appendix 8 – Comparison of meta-analyses' effect sizes*

Note: ES=effect size

| <i>Study</i>            | <i>Meta-analysis ES (O)*</i> | <i>Largest Study ES (E)**</i> | <i>Observed/expected Ratio</i> |
|-------------------------|------------------------------|-------------------------------|--------------------------------|
| <i>Yu, 2012</i>         | 3.0                          | 2.9                           | 1.0                            |
| <i>Fazel, 2010</i>      | 4.1                          | 2.5                           | 1.6                            |
| <i>Fazel, 2009</i>      | 1.7                          | 1.3                           | 1.3                            |
| <i>Fazel, 2009</i>      | 0.7                          | 0.7                           | 1.0                            |
| <i>Fazel, 2009</i>      | 7.4                          | 4.0                           | 1.9                            |
| <i>Fazel, 2009</i>      | 5.5                          | 3.4                           | 1.6                            |
| <i>Fazel, 2009</i>      | 4.9                          | 2.6                           | 1.9                            |
| <i>Ttofi, 2012</i>      | 1.4                          | 1.3                           | 1.2                            |
| <i>Wilson, 2009</i>     | 2.7                          | 1.2                           | 2.3                            |
| <i>Murray, 2012</i>     | 1.6                          | 1.6                           | 1.0                            |
| <i>Stamms, 2006</i>     | 4.0                          | 6.7                           | 0.6                            |
| <i>Morgan, 2000</i>     | 2.8                          | 3.6                           | 0.8                            |
| <i>G-Gonzalez, 2006</i> | 4.6                          | 2.9                           | 1.6                            |

**Table – A comparison of meta-analyses' overall effect size ('O' or 'observed') versus effect size of meta-analyses' largest included study effect size ('E' or 'expected').**

Appendix 9 – Effect sizes for risk factors with prediction intervals

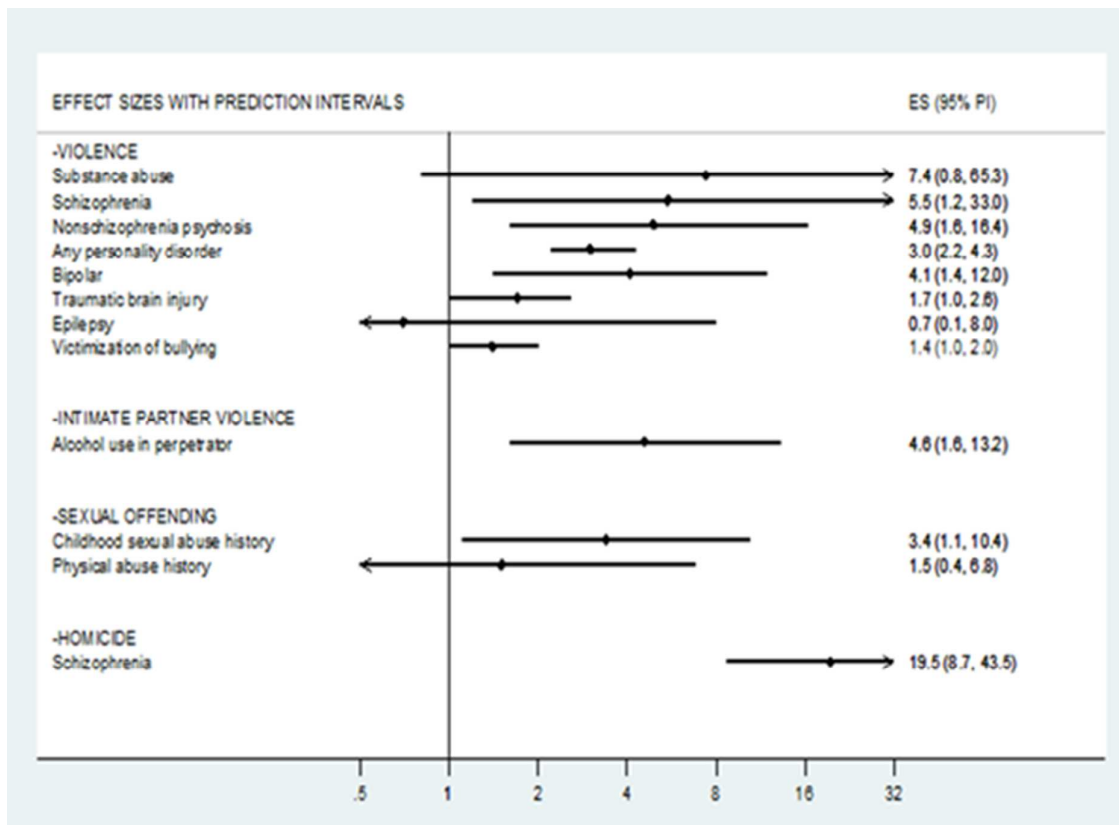

Figure – Effect sizes for risk factors with prediction intervals

Note: prediction intervals that exclude the null value are deemed to be of higher quality

*Appendix 10 – Full Details of Quality Analysis Tables*

Scores: Prediction interval excluding null value = 1; p-value less than 0.05 for random effects model = 1; low heterogeneity ( $I^2 < 50\%$ ) = 1; case number > 1000 = 1; no evidence to suggest small study effects = 1; confounders adjusted for = 1.

| <b>Risk Factor</b>         | <b>Outcome Category</b> | <b>Prediction Interval Excludes Null Value</b> | <b>p-Value</b> | <b>Heterogeneity</b> | <b>Number of Cases &gt; 1000</b> | <b>Small Study Effects</b> | <b>Confounder Adjusted</b> | <b>Total Score (maximum score = 6)</b> |
|----------------------------|-------------------------|------------------------------------------------|----------------|----------------------|----------------------------------|----------------------------|----------------------------|----------------------------------------|
| Substance abuse            | Violence                | No                                             | 0.001          | High                 | Yes                              | Yes                        | Yes                        | 3                                      |
| Schizophrenia              | Violence                | Yes                                            | < 0.001        | High                 | Yes                              | Yes                        | Yes                        | 4                                      |
| Nonschizophrenia psychoses | Violence                | Yes                                            | < 0.001        | High                 | Yes                              | Yes                        | Yes                        | 4                                      |
| Any personality disorder   | Violence                | Yes                                            | 0.309          | Low                  | Yes                              | No                         | Yes                        | 5                                      |
| Bipolar disorder           | Violence                | Yes                                            | < 0.001        | High                 | Yes                              | Yes                        | Yes                        | 4                                      |
| Traumatic brain injury     | Violence                | No                                             | 0.585          | Low                  | Yes                              | Yes                        | Yes                        | 3                                      |
| Hyperkinetic disorder      | Violence                | No                                             | < 0.01         |                      | Yes                              |                            | Yes                        | 3                                      |
| Epilepsy                   | Violence                | No                                             | 0.779          | Low                  | No                               | No                         | Yes                        | 3                                      |
| Youth antisocial behaviour | Violence                |                                                |                |                      | Yes                              |                            | Yes                        | 2                                      |

|                                           |          |    |         |      |     |     |     |   |
|-------------------------------------------|----------|----|---------|------|-----|-----|-----|---|
| Victimization of bullying                 | Violence | No | 0.042   | Low  |     | Yes | 4   |   |
| Exposure to violence                      | Violence |    |         | High | Yes | Yes | 2   |   |
| Poor attachment to parents                | Violence |    |         | High | Yes | Yes | 2   |   |
| Parental incarceration                    | Violence |    | < 0.01  | High | Yes | Yes | 3   |   |
| Antisocial attitudes in parents and peers | Violence |    | < 0.01  | High | Yes | Yes | 3   |   |
| Family problems                           | Violence |    |         | High | Yes | Yes | 2   |   |
| Poor executive function                   | Violence |    |         | High | Yes | No  | Yes | 4 |
| Poor moral judgement                      | Violence |    | < 0.001 | High | Yes | No  | Yes | 4 |
| Low empathy                               | Violence |    |         | High | Yes | Yes | 2   |   |



|                                        |                  |     |       |      |    |     |   |
|----------------------------------------|------------------|-----|-------|------|----|-----|---|
| jealousy in perpetrator                |                  |     |       |      |    |     |   |
| Exposure to violence in perpetrator    | IPV              |     |       |      |    | Yes | 1 |
| Substance abuse in perpetrator         | IPV              |     |       |      |    | Yes | 1 |
| Childhood sexual abuse                 | Sexual offending | Yes |       | High |    | Yes | 2 |
| Social problems                        | Sexual offending |     |       | High |    | Yes | 1 |
| Tolerant attitudes to sexual offending | Sexual offending |     |       |      |    | Yes | 1 |
| Externalizing behavioural problems     | Sexual offending |     |       |      |    | Yes | 1 |
| Sexual problems                        | Sexual offending |     |       |      |    | Yes | 1 |
| Internalizing behavioural problems     | Sexual offending |     |       |      |    | Yes | 1 |
| Family problems                        | Sexual offending |     |       |      |    | Yes | 1 |
| Physical abuse in childhood            | Sexual offending | No  |       | High |    | Yes | 1 |
| Schizophrenia                          | Homicide         | Yes |       | High | No | Yes | 2 |
|                                        |                  |     | 0.042 |      |    |     |   |
| Substance abuse                        | Homicide         |     | 0.001 | High | No | Yes | 1 |
